# Supplementary material for: Impacts of Invasive Plants on Native Vegetation Communities in Wetland and Stream Mitigation
Source: MDPI journal article supplement (doi:10.3390/biology13040275), 2024-04-18
Supplement: s1 [file s1]

## Checklist of Species Sampled (Wetland Dataset)

D. Hunter (sites sampled during peak growing season, 2018)

| Scientific Name                                                           | Common Name                 | Family        | Status <sup>1</sup> |
|---------------------------------------------------------------------------|-----------------------------|---------------|---------------------|
| <i>Acalypha rhomboidea</i> Raf.                                           | Common Three-seeded Mercury | Euphorbiaceae | Native              |
| <i>Acer negundo</i> L.                                                    | Eastern Boxelder            | Sapindaceae   | Native              |
| <i>Acer rubrum</i> L.                                                     | Red Maple                   | Sapindaceae   | Native              |
| <i>Acer saccharinum</i> L.                                                | Silver Maple                | Sapindaceae   | Native              |
| <i>Agalinis purpurea</i> (L.) Pennell                                     | Purple False Foxglove       | Orobanchaceae | Native              |
| <i>Agrimonia parviflora</i> Ait.                                          | Small-flowered Agrimony     | Rosaceae      | Native              |
| <i>Agrostis gigantea</i> Roth                                             | Redtop                      | Poaceae       | Non-native          |
| <i>Alisma subcordatum</i> Raf.                                            | Southern Water-plantain     | Alismataceae  | Native              |
| <i>Alnus serrulata</i> (Ait.) Willd.                                      | Smooth Alder                | Betulaceae    | Native              |
| <i>Ambrosia artemisiifolia</i> L.                                         | Common Ragweed              | Asteraceae    | Native              |
| <i>Ammannia coccinea</i> Rottb.                                           | Scarlet Ammannia            | Lythraceae    | Native              |
| <i>Ampelopsis brevipedunculata</i> (Maxim.) Trautv.                       | Porcelain-berry             | Vitaceae      | Invasive            |
| <i>Amphicarpaea bracteata</i> (L.) Fern.                                  | Hog-peanut                  | Fabaceae      | Native              |
| <i>Anagallis arvensis</i> L.                                              | Scarlet Pimpernel           | Primulaceae   | Non-native          |
| <i>Andropogon gerardii</i> Vitman                                         | Big Bluestem                | Poaceae       | Native              |
| <i>Andropogon virginicus</i> L.                                           | Broomsedge                  | Poaceae       | Native              |
| <i>Antennaria plantaginifolia</i> (L.) Richards.                          | Plantain-leaved Pussytoes   | Asteraceae    | Native              |
| <i>Apocynum cannabinum</i> L.                                             | Indian Hemp                 | Apocynaceae   | Native              |
| <i>Arthraxon hispidus</i> (Thunb.) Makino                                 | Joint-head Grass            | Poaceae       | Invasive            |
| <i>Asclepias incarnata</i> L. var. <i>pulchra</i> (Ehrh. ex Willd.) Pers. | Swamp Milkweed              | Apocynaceae   | Native              |
| <i>Azolla caroliniana</i> Willd.                                          | Eastern Mosquito Fern       | Salviniaceae  | Native              |
| <i>Baccharis halimifolia</i> L.                                           | Groundsel Tree              | Asteraceae    | Native              |
| <i>Betula nigra</i> L.                                                    | River Birch                 | Betulaceae    | Native              |
| <i>Bidens aristosa</i> (Michx.) Britt.                                    | Tickseed Sunflower          | Asteraceae    | Native              |
| <i>Bidens comosa</i> (Gray) Wiegand                                       | Three-lobed Beggar-ticks    | Asteraceae    | Native              |
| <i>Boehmeria cylindrica</i> (L.) Sw.                                      | False Nettle                | Urticaceae    | Native              |
| <i>Campsis radicans</i> (L.) Seem. ex Bureau                              | Trumpet-creeper             | Bignoniaceae  | Native              |
| <i>Carex comosa</i> Boott                                                 | Bottlebrush Sedge           | Cyperaceae    | Native              |
| <i>Carex complanata</i> Torr. & Hook.                                     | Hirsute Sedge               | Cyperaceae    | Native              |
| <i>Carex crinita</i> Lam.                                                 | Long-fringed Sedge          | Cyperaceae    | Native              |
| <i>Carex frankii</i> Kunth                                                | Frank's Sedge               | Cyperaceae    | Native              |
| <i>Carex grayi</i> Carey                                                  | Gray's Sedge                | Cyperaceae    | Native              |
| <i>Carex lupulina</i> Willd.                                              | Hop Sedge                   | Cyperaceae    | Native              |
| <i>Carex lurida</i> Wahlenb.                                              | Sallow Sedge                | Cyperaceae    | Native              |
| <i>Carex scoparia</i> Schk. ex Willd.                                     | Broom Sedge                 | Cyperaceae    | Native              |
| <i>Carex squarrosa</i> L.                                                 | Squarrose Sedge             | Cyperaceae    | Native              |
| <i>Carex swanii</i> (Fern.) Mackenzie                                     | Swan's Sedge                | Cyperaceae    | Native              |
| <i>Carex tribuloides</i> Wahlenb.                                         | Blunt Broom Sedge           | Cyperaceae    | Native              |
| <i>Carex vulpinoidea</i> Michaux                                          | Fox Sedge                   | Cyperaceae    | Native              |
| <i>Celtis occidentalis</i> L.                                             | Common Hackberry            | Cannabaceae   | Native              |
| <i>Cephalanthus occidentalis</i> L.                                       | Buttonbush                  | Rubiaceae     | Native              |
| <i>Chasmanthium laxum</i> (L.) Yates                                      | Slender Spikegrass          | Poaceae       | Native              |
| <i>Cicuta maculata</i> L.                                                 | Water-hemlock               | Apiaceae      | Native              |

## Checklist of Species Sampled (Wetland Dataset)

D. Hunter (sites sampled during peak growing season, 2018)

| Scientific Name                                                           | Common Name                | Family         | Status <sup>1</sup> |
|---------------------------------------------------------------------------|----------------------------|----------------|---------------------|
| <i>Cinna arundinacea</i> L.                                               | Common Wood Reedgrass      | Poaceae        | Native              |
| <i>Coleataenia anceps</i> (Michx.) Soreng                                 | Beaked Panic Grass         | Poaceae        | Native              |
| <i>Coleataenia stipitata</i> (Nash) LeBlond                               | Redtop Panic Grass         | Poaceae        | Native              |
| <i>Conoclinium coelestinum</i> (L.) DC.                                   | Mistflower                 | Asteraceae     | Native              |
| <i>Cornus amomum</i> P. Mill.                                             | Silky Dogwood              | Cornaceae      | Native              |
| <i>Cuscuta gronovii</i> Willd. ex Roem. & Schult.                         | Common Dodder              | Convolvulaceae | Native              |
| <i>Cyperus bipartitus</i> Torrey                                          | Slender Flatsedge          | Cyperaceae     | Native              |
| <i>Cyperus difformis</i> L.                                               | Variable Flatsedge         | Cyperaceae     | Non-native          |
| <i>Cyperus iria</i> L.                                                    | Rice-field Flatsedge       | Cyperaceae     | Non-native          |
| <i>Cyperus pseudovegetus</i> Steudel                                      | Green Flatsedge            | Cyperaceae     | Native              |
| <i>Cyperus strigosus</i> L.                                               | Straw-colored Flatsedge    | Cyperaceae     | Native              |
| <i>Desmodium paniculatum</i> (L.) DC.                                     | Narrow-leaf Tick-trefoil   | Fabaceae       | Native              |
| <i>Dichanthelium clandestinum</i> (L.) Gould                              | Deer-Tongue Grass          | Poaceae        | Native              |
| <i>Dichanthelium commutatum</i> (J.A. Schultes) Gould                     | Variable Panic Grass       | Poaceae        | Native              |
| <i>Dichanthelium dichotomum</i> (L.) Gould                                | Small-fruited Panic Grass  | Poaceae        | Native              |
| <i>Dichanthelium scoparium</i> (Lam.) Gould                               | Velvet Panic Grass         | Poaceae        | Native              |
| <i>Digitaria villosa</i> (Walt.) Pers.                                    | Shaggy Crabgrass           | Poaceae        | Native              |
| <i>Diodia teres</i> Walt.                                                 | Common Buttonweed          | Rubiaceae      | Native              |
| <i>Diodia virginiana</i> L.                                               | Virginia Buttonweed        | Rubiaceae      | Native              |
| <i>Diospyros virginiana</i> L.                                            | Common Persimmon           | Ebenaceae      | Native              |
| <i>Echinochloa muricata</i> (Beauv.) Fern. var. <i>microstachya</i> Wieg. | Rough Barnyard Grass       | Poaceae        | Native              |
| <i>Echinochloa muricata</i> (Beauv.) Fern. var. <i>muricata</i>           | Rough Barnyard Grass       | Poaceae        | Native              |
| <i>Eclipta prostrata</i> (L.) L.                                          | False Daisy                | Asteraceae     | Native              |
| <i>Eleocharis acicularis</i> (L.) Roemer & Schultes                       | Needle Spikerush           | Cyperaceae     | Native              |
| <i>Eleocharis obtusa</i> (Willd.) Schultes                                | Blunt Spikerush            | Cyperaceae     | Native              |
| <i>Eleocharis quadrangulata</i> (Michx.) R. & S.                          | Square-stem Spikerush      | Cyperaceae     | Native              |
| <i>Eleocharis tenuis</i> (Willd.) Schultes                                | Slender Spikerush          | Cyperaceae     | Native              |
| <i>Elymus virginicus</i> L.                                               | Virginia Wild Rye          | Poaceae        | Native              |
| <i>Epilobium coloratum</i> Biehler                                        | Purple-leaved Willow-herb  | Onagraceae     | Native              |
| <i>Erechtites hieraciifolius</i> (L.) Raf. ex DC.                         | Fireweed                   | Asteraceae     | Native              |
| <i>Erianthus giganteus</i> (Walt.) P. Beauv.                              | Giant Plumegrass           | Poaceae        | Native              |
| <i>Eupatorium capillifolium</i> (Lam.) Small                              | Dog-fennel                 | Asteraceae     | Native              |
| <i>Eupatorium perfoliatum</i> L.                                          | Boneset                    | Asteraceae     | Native              |
| <i>Eupatorium serotinum</i> Michx.                                        | Late Thoroughwort          | Asteraceae     | Native              |
| <i>Euthamia caroliniana</i> (L.) Greene ex Porter & Britton               | Slender Flat-top Goldenrod | Asteraceae     | Native              |
| <i>Euthamia graminifolia</i> (L.) Nutt.                                   | Grass-leaved Goldenrod     | Asteraceae     | Native              |
| <i>Fimbristylis autumnalis</i> (L.) R. & S.                               | Slender Fimbry             | Cyperaceae     | Native              |
| <i>Fraxinus pennsylvanica</i> Marsh.                                      | Green Ash                  | Oleaceae       | Native              |
| <i>Galium tinctorium</i> (L.) Scop.                                       | Three-lobed Bedstraw       | Rubiaceae      | Native              |
| <i>Geum virginianum</i> L.                                                | Cream Avers                | Rosaceae       | Native              |

## Checklist of Species Sampled (Wetland Dataset)

D. Hunter (sites sampled during peak growing season, 2018)

| Scientific Name                                                                  | Common Name                       | Family         | Status <sup>1</sup> |
|----------------------------------------------------------------------------------|-----------------------------------|----------------|---------------------|
| <i>Hamamelis virginiana</i> L.                                                   | Witch Hazel                       | Hamamelidaceae | Native              |
| <i>Hibiscus moscheutos</i> L.                                                    | Swamp Rose-mallow                 | Malvaceae      | Native              |
| <i>Hypericum mutilum</i> L.                                                      | Dwarf St. John's-wort             | Hypericaceae   | Native              |
| <i>Hypericum virginicum</i> L.                                                   | Virginia Marsh St. John's-wort    | Hypericaceae   | Native              |
| <i>Ilex verticillata</i> (L.) Gray                                               | Winterberry                       | Aquifoliaceae  | Native              |
| <i>Impatiens capensis</i> Meerburg                                               | Spotted Jewelweed                 | Balsaminaceae  | Native              |
| <i>Ipomoea lacunosa</i> L.                                                       | Small White Morning Glory         | Convolvulaceae | Native              |
| <i>Itea virginica</i> L.                                                         | Virginia Sweetspire               | Iteaceae       | Native              |
| <i>Juncus acuminatus</i> Michx.                                                  | Sharp-fruited Rush                | Juncaceae      | Native              |
| <i>Juncus canadensis</i> J. Gay ex Laharpe                                       | Canadian Rush                     | Juncaceae      | Native              |
| <i>Juncus effusus</i> L.                                                         | Soft Rush                         | Juncaceae      | Native              |
| <i>Juncus marginatus</i> Rostk.                                                  | Grass-leaved Rush                 | Juncaceae      | Native              |
| <i>Juncus tenuis</i> Willd.                                                      | Path Rush                         | Juncaceae      | Native              |
| <i>Juniperus virginiana</i> L.                                                   | Eastern Redcedar                  | Cupressaceae   | Native              |
| <i>Kummerowia stipulacea</i> (Maxim.) Makino                                     | Korean-clover                     | Fabaceae       | Non-native          |
| <i>Landoltia punctata</i> (G. Mey.) D.H. Les & D.J. Crawford                     | Dotted Duckmeat                   | Araceae        | Non-native          |
| <i>Leersia oryzoides</i> (L.) Sw.                                                | Rice Cutgrass                     | Poaceae        | Native              |
| <i>Lemna minor</i> L.                                                            | Common Duckweed                   | Araceae        | Native              |
| <i>Lespedeza cuneata</i> (Dum.-Cours.) G. Don                                    | Sericea Lespedeza                 | Fabaceae       | Invasive            |
| <i>Lindernia dubia</i> (L.) Pennell var. <i>anagallidea</i> (Michx.) Cooperrider | Long-stalked False Pimpernel      | Linderniaceae  | Native              |
| <i>Lindernia dubia</i> (L.) Pennell var. <i>dubia</i>                            | False Pimpernel                   | Linderniaceae  | Native              |
| <i>Liquidambar styraciflua</i> L.                                                | Sweetgum                          | Altingiaceae   | Native              |
| <i>Liriodendron tulipifera</i> L.                                                | Tulip-tree                        | Magnoliaceae   | Native              |
| <i>Lonicera japonica</i> Thunb.                                                  | Japanese Honeysuckle              | Caprifoliaceae | Invasive            |
| <i>Ludwigia alata</i> Elliott                                                    | Winged Seedbox                    | Onagraceae     | Native              |
| <i>Ludwigia alternifolia</i> L.                                                  | Alternate-leaved Seedbox          | Onagraceae     | Native              |
| <i>Ludwigia decurrens</i> Walter                                                 | Wing-leaved Primrose-willow       | Onagraceae     | Native              |
| <i>Ludwigia glandulosa</i> Walter                                                | Cylindric-fruited Primrose-willow | Onagraceae     | Native              |
| <i>Ludwigia palustris</i> (L.) Elliott                                           | Marsh Seedbox                     | Onagraceae     | Native              |
| <i>Lycopus virginicus</i> L.                                                     | Virginia Bugleweed                | Lamiaceae      | Native              |
| <i>Lysimachia nummularia</i> L.                                                  | Moneywort                         | Primulaceae    | Invasive            |
| <i>Lythrum salicaria</i> L.                                                      | Purple Loosestrife                | Lythraceae     | Invasive            |
| <i>Microstegium vimineum</i> (Trin.) A. Camus                                    | Japanese Stiltgrass               | Poaceae        | Invasive            |
| <i>Mikania scandens</i> (L.) Willd.                                              | Climbing Hempweed                 | Asteraceae     | Native              |
| <i>Mimulus alatus</i> Aiton                                                      | Winged Monkeyflower               | Phrymaceae     | Native              |
| <i>Morella cerifera</i> (L.) Small                                               | Wax Myrtle                        | Myricaceae     | Native              |
| <i>Murdannia keisak</i> (Hasskarl) Handel-Mazzetti                               | Marsh Dewflower                   | Commelinaceae  | Invasive            |
| <i>Nyssa sylvatica</i> Marsh.                                                    | Black Gum                         | Nyssaceae      | Native              |
| <i>Onoclea sensibilis</i> L.                                                     | Sensitive Fern                    | Onocleaceae    | Native              |
| <i>Oxalis stricta</i> L.                                                         | Common Yellow Wood-sorrel         | Oxalidaceae    | Native              |
| <i>Panicum verrucosum</i> Muhl.                                                  | Warty Panic Grass                 | Poaceae        | Native              |
| <i>Panicum virgatum</i> L.                                                       | Switchgrass                       | Poaceae        | Native              |

## Checklist of Species Sampled (Wetland Dataset)

D. Hunter (sites sampled during peak growing season, 2018)

| Scientific Name                                             | Common Name                     | Family           | Status <sup>1</sup> |
|-------------------------------------------------------------|---------------------------------|------------------|---------------------|
| <i>Parthenocissus quinquefolia</i> (L.) Planch.             | Virginia-creeper                | Vitaceae         | Native              |
| <i>Paspalum laeve</i> Michx.                                | Field Paspalum                  | Poaceae          | Native              |
| <i>Peltandra virginica</i> (L.) Schott                      | Arrow-arum                      | Araceae          | Native              |
| <i>Persicaria arifolia</i> (L.) Haraldson                   | Halberd-leaf Tearthumb          | Polygonaceae     | Native              |
| <i>Persicaria glabra</i> (Willd.) M. Gomez                  | Dense-flowered Smartweed        | Polygonaceae     | Native              |
| <i>Persicaria hydropiperoides</i> (Michx.) Small            | Mild Water-pepper               | Polygonaceae     | Native              |
| <i>Persicaria pensylvanica</i> (L.) M. Gomez                | Pennsylvania Smartweed          | Polygonaceae     | Native              |
| <i>Persicaria sagittata</i> (L.) H. Gross ex Nakai          | Arrow-leaf Tearthumb            | Polygonaceae     | Native              |
| <i>Phegopteris hexagonoptera</i> (Michx.) Fee               | Broad Beech Fern                | Thelypteridaceae | Native              |
| <i>Pinus rigida</i> Miller                                  | Pitch Pine                      | Pinaceae         | Native              |
| <i>Pinus taeda</i> L.                                       | Loblolly Pine                   | Pinaceae         | Native              |
| <i>Plantago major</i> L.                                    | Common Plantain                 | Plantaginaceae   | Non-native          |
| <i>Platanus occidentalis</i> L.                             | Sycamore                        | Platanaceae      | Native              |
| <i>Pluchea odorata</i> (L.) Cass.                           | Salt Marsh Fleabane             | Asteraceae       | Native              |
| <i>Poa annua</i> L.                                         | Annual Bluegrass                | Poaceae          | Non-native          |
| <i>Poa trivialis</i> L.                                     | Rough Bluegrass                 | Poaceae          | Invasive            |
| <i>Pontederia cordata</i> L.                                | Pickernelweed                   | Pontederiaceae   | Native              |
| <i>Quercus alba</i> L.                                      | White Oak                       | Fagaceae         | Native              |
| <i>Quercus bicolor</i> Willd.                               | Swamp White Oak                 | Fagaceae         | Native              |
| <i>Quercus michauxii</i> Nutt.                              | Swamp Chestnut Oak              | Fagaceae         | Native              |
| <i>Quercus nigra</i> L.                                     | Water Oak                       | Fagaceae         | Native              |
| <i>Quercus palustris</i> Muenchhausen                       | Pin Oak                         | Fagaceae         | Native              |
| <i>Quercus phellos</i> L.                                   | Willow Oak                      | Fagaceae         | Native              |
| <i>Rhexia mariana</i> L.                                    | Maryland Meadow Beauty          | Melastomataceae  | Native              |
| <i>Rhynchospora corniculata</i> (Lam.) Gray                 | Short-bristled Horned Beaksedge | Cyperaceae       | Native              |
| <i>Rhynchospora glomerata</i> (L.) Vahl                     | Clustered Beaksedge             | Cyperaceae       | Native              |
| <i>Rhynchospora microcephala</i> (Britton) Britton ex Small | Small-headed Bunched Beaksedge  | Cyperaceae       | Native              |
| <i>Rotala ramosior</i> (L.) Koehne                          | Toothcup                        | Lythraceae       | Native              |
| <i>Rubus flagellaris</i> Willd.                             | Common Dewberry                 | Rosaceae         | Native              |
| <i>Rubus pensilvanicus</i> Poir.                            | Pennsylvania Blackberry         | Rosaceae         | Native              |
| <i>Rudbeckia laciniata</i> L.                               | Cut-leaf Coneflower             | Asteraceae       | Native              |
| <i>Sagittaria latifolia</i> Willd.                          | Broad-leaved Arrowhead          | Alismataceae     | Native              |
| <i>Salix nigra</i> Marsh.                                   | Black Willow                    | Salicaceae       | Native              |
| <i>Saururus cernuus</i> L.                                  | Lizard's-tail                   | Saururaceae      | Native              |
| <i>Schoenoplectus mucronatus</i> (L.) Palla                 | Bog Bulrush                     | Cyperaceae       | Native              |
| <i>Schoenoplectus purshianus</i> (Fern.) Strong             | Blunt-scale Bulrush             | Cyperaceae       | Native              |
| <i>Schoenoplectus tabernaemontani</i> (Gmelin) Palla        | Soft-stem Bulrush               | Cyperaceae       | Native              |
| <i>Scirpus atrovirens</i> Willd.                            | Dark Green Bulrush              | Cyperaceae       | Native              |
| <i>Scirpus cyperinus</i> (L.) Kunth                         | Woolgrass                       | Cyperaceae       | Native              |
| <i>Scirpus georgianus</i> Harper                            | Georgia Bulrush                 | Cyperaceae       | Native              |
| <i>Scutellaria integrifolia</i> L.                          | Hyssop Skullcap                 | Lamiaceae        | Native              |
| <i>Scutellaria lateriflora</i> L.                           | Mad-dog Skullcap                | Lamiaceae        | Native              |
| <i>Setaria faberi</i> Herrm.                                | Nodding Bristlegrass            | Poaceae          | Non-native          |

## Checklist of Species Sampled (Wetland Dataset)

D. Hunter (sites sampled during peak growing season, 2018)

| Scientific Name                                 | Common Name              | Family           | Status <sup>1</sup> |
|-------------------------------------------------|--------------------------|------------------|---------------------|
| <i>Setaria parviflora</i> (Poir.) Kerguelen     | Knotroot Bristlegrass    | Poaceae          | Native              |
| <i>Setaria pumila</i> (Poir.) Roemer & Schultes | Yellow Bristlegrass      | Poaceae          | Non-native          |
| <i>Smilax rotundifolia</i> L.                   | Common Greenbrier        | Smilacaceae      | Native              |
| <i>Smilax walteri</i> Pursh                     | Coral Greenbrier         | Smilacaceae      | Native              |
| <i>Solanum carolinense</i> L.                   | Horse-nettle             | Solanaceae       | Native              |
| <i>Solidago altissima</i> L.                    | Tall Goldenrod           | Asteraceae       | Native              |
| <i>Solidago rugosa</i> P. Mill.                 | Wrinkle-leaf Goldenrod   | Asteraceae       | Native              |
| <i>Sorghum halepense</i> (L.) Pers.             | Johnson Grass            | Poaceae          | Invasive            |
| <i>Symphoricarpos orbiculatus</i> Moench        | Coralberry               | Caprifoliaceae   | Native              |
| <i>Symphyotrichum racemosum</i> (Ell.) Nesom    | Small White Aster        | Asteraceae       | Native              |
| <i>Taxodium distichum</i> (L.) Richard          | Baldcypress              | Cupressaceae     | Native              |
| <i>Toxicodendron radicans</i> (L.) Kuntze       | Poison Ivy               | Anacardiaceae    | Native              |
| <i>Tridens flavus</i> (L.) A.S. Hitchc.         | Purpletop                | Poaceae          | Native              |
| <i>Trifolium pratense</i> L.                    | Red Clover               | Fabaceae         | Non-native          |
| <i>Typha latifolia</i> L.                       | Broadleaf Cattail        | Typhaceae        | Native              |
| <i>Ulmus rubra</i> Muhl.                        | Slippery Elm             | Ulmaceae         | Native              |
| <i>Utricularia geminiscapa</i> Benj.            | Two-flowered Bladderwort | Lentibulariaceae | Native              |
| <i>Utricularia gibba</i> L.                     | Humped Bladderwort       | Lentibulariaceae | Native              |
| <i>Verbena hastata</i> L.                       | Blue Vervain             | Verbenaceae      | Native              |
| <i>Vernonia glauca</i> (L.) Willd.              | Upland Ironweed          | Asteraceae       | Native              |
| <i>Viburnum dentatum</i> L.                     | Arrow-wood               | Adoxaceae        | Native              |
| <i>Viola sororia</i> Willd.                     | Common Blue Violet       | Violaceae        | Native              |
| <i>Vitis aestivalis</i> Michx.                  | Summer Grape             | Vitaceae         | Native              |
| <i>Vitis rotundifolia</i> Michx.                | Muscadine Grape          | Vitaceae         | Native              |
| <i>Woodwardia areolata</i> (L.) T. Moore        | Netted Chain Fern        | Blechnaceae      | Native              |
| <i>Xanthium strumarium</i> L.                   | Common Cocklebur         | Asteraceae       | Native              |

<sup>1</sup> Status = "Native", "Non-native", or "Invasive" in accordance with Heffernan et al. (2014) and Weakley et al. (2020).

## Checklist of Species Sampled (Stream Dataset)

D. DeBerry (sites sampled during peak growing seasons, 2018 and 2019)

| Scientific Name                                                           | Common Name                 | Family          | Status <sup>1</sup> |
|---------------------------------------------------------------------------|-----------------------------|-----------------|---------------------|
| <i>Acalypha rhomboidea</i> Raf.                                           | Common Three-seeded Mercury | Euphorbiaceae   | Native              |
| <i>Acer rubrum</i> L.                                                     | Red Maple                   | Sapindaceae     | Native              |
| <i>Acer saccharinum</i> L.                                                | Silver Maple                | Sapindaceae     | Native              |
| <i>Aegopodium podagraria</i> L.                                           | Bishop's Goutweed           | Apiaceae        | Non-native          |
| <i>Agalinis purpurea</i> (L.) Pennell                                     | Purple False Foxglove       | Orobanchaceae   | Native              |
| <i>Agrimonia parviflora</i> Ait.                                          | Small-flowered Agrimony     | Rosaceae        | Native              |
| <i>Agrostis perennans</i> (Walt.) Tuckerman                               | Autumn Bentgrass            | Poaceae         | Native              |
| <i>Ailanthus altissima</i> (P. Miller) Swingle                            | Tree-of-heaven              | Simaroubaceae   | Invasive            |
| <i>Albizia julibrissin</i> Durazz.                                        | Mimosa                      | Fabaceae        | Invasive            |
| <i>Alliaria petiolata</i> (Bieberstein) Cavara & Grande                   | Garlic Mustard              | Brassicaceae    | Invasive            |
| <i>Allium canadense</i> L.                                                | Wild Onion                  | Amaryllidaceae  | Native              |
| <i>Alnus serrulata</i> (Ait.) Willd.                                      | Smooth Alder                | Betulaceae      | Native              |
| <i>Ambrosia artemisiifolia</i> L.                                         | Common Ragweed              | Asteraceae      | Native              |
| <i>Ambrosia trifida</i> L.                                                | Giant Ragweed               | Asteraceae      | Native              |
| <i>Amelanchier arborea</i> (Michx. f.) Fernald                            | Downy Serviceberry          | Rosaceae        | Native              |
| <i>Ampelopsis brevipedunculata</i> (Maxim.) Trautv.                       | Porcelain-berry             | Vitaceae        | Invasive            |
| <i>Amphicarpaea bracteata</i> (L.) Fern.                                  | Hog-peanut                  | Fabaceae        | Native              |
| <i>Andropogon gerardii</i> Vitman                                         | Big Bluestem                | Poaceae         | Native              |
| <i>Andropogon virginicus</i> L.                                           | Broomsedge                  | Poaceae         | Native              |
| <i>Antennaria plantaginifolia</i> (L.) Richards.                          | Plantain-leaved Pussytoes   | Asteraceae      | Native              |
| <i>Artemisia vulgaris</i> L.                                              | Common Mugwort              | Asteraceae      | Non-native          |
| <i>Arthraxon hispidus</i> (Thunb.) Makino                                 | Joint-head Grass            | Poaceae         | Invasive            |
| <i>Asclepias incarnata</i> L. var. <i>pulchra</i> (Ehrh. ex Willd.) Pers. | Swamp Milkweed              | Apocynaceae     | Native              |
| <i>Asclepias syriaca</i> L.                                               | Common Milkweed             | Apocynaceae     | Native              |
| <i>Asimina triloba</i> (L.) Dunal                                         | Pawpaw                      | Annonaceae      | Native              |
| <i>Athyrium asplenoides</i> (Michx.) A.A. Eaton                           | Southern Lady Fern          | Woodsiaceae     | Native              |
| <i>Baccharis halimifolia</i> L.                                           | Groundsel Tree              | Asteraceae      | Native              |
| <i>Betula nigra</i> L.                                                    | River Birch                 | Betulaceae      | Native              |
| <i>Bidens aristosa</i> (Michx.) Britt.                                    | Tickseed Sunflower          | Asteraceae      | Native              |
| <i>Bidens bipinnata</i> L.                                                | Spanish Needles             | Asteraceae      | Native              |
| <i>Bidens frondosa</i> L.                                                 | Devil's Beggar-ticks        | Asteraceae      | Native              |
| <i>Bignonia capreolata</i> L.                                             | Cross-vine                  | Bignoniaceae    | Native              |
| <i>Boehmeria cylindrica</i> (L.) Sw.                                      | False Nettle                | Urticaceae      | Native              |
| <i>Botrypus virginianus</i> (L.) Holub                                    | Rattlesnake Fern            | Ophioglossaceae | Native              |
| <i>Callicarpa americana</i> L.                                            | American Beauty-berry       | Lamiaceae       | Native              |
| <i>Calystegia sepium</i> (L.) R. Br.                                      | Hedge Bindweed              | Convolvulaceae  | Native              |
| <i>Campsis radicans</i> (L.) Seem. ex Bureau                              | Trumpet-creeper             | Bignoniaceae    | Native              |
| <i>Cardamine hirsuta</i> L.                                               | Hairy Bittercress           | Brassicaceae    | Non-native          |
| <i>Carduus nutans</i> L.                                                  | Musk Thistle                | Asteraceae      | Non-native          |
| <i>Carex amphibola</i> Steudel                                            | Eastern Narrow-leaved Sedge | Cyperaceae      | Native              |
| <i>Carex blanda</i> Dewey                                                 | Eastern Woodland Sedge      | Cyperaceae      | Native              |
| <i>Carex debilis</i> Michx.                                               | White-edged Sedge           | Cyperaceae      | Native              |
| <i>Carex frankii</i> Kunth                                                | Frank's Sedge               | Cyperaceae      | Native              |



## Checklist of Species Sampled (Stream Dataset)

D. DeBerry (sites sampled during peak growing seasons, 2018 and 2019)

| Scientific Name                                                 | Common Name               | Family        | Status <sup>1</sup> |
|-----------------------------------------------------------------|---------------------------|---------------|---------------------|
| <i>Carex lurida</i> Wahlenb.                                    | Sallow Sedge              | Cyperaceae    | Native              |
| <i>Carex retroflexa</i> Muhl. ex Willd.                         | Reflexed Sedge            | Cyperaceae    | Native              |
| <i>Carex squarrosa</i> L.                                       | Squarrose Sedge           | Cyperaceae    | Native              |
| <i>Carex swanii</i> (Fern.) Mackenzie                           | Swan's Sedge              | Cyperaceae    | Native              |
| <i>Carex tribuloides</i> Wahlenb.                               | Blunt Broom Sedge         | Cyperaceae    | Native              |
| <i>Carex vulpinoidea</i> Michx.                                 | Fox Sedge                 | Cyperaceae    | Native              |
| <i>Carpinus caroliniana</i> Walt.                               | Ironwood                  | Betulaceae    | Native              |
| <i>Carya cordiformis</i> (Wangenh.) K. Koch                     | Bitternut Hickory         | Juglandaceae  | Native              |
| <i>Carya glabra</i> (P. Miller) Sweet                           | Pignut Hickory            | Juglandaceae  | Native              |
| <i>Celastrus orbiculatus</i> Thunb.                             | Oriental Bittersweet      | Celastraceae  | Invasive            |
| <i>Celtis occidentalis</i> L.                                   | Common Hackberry          | Cannabaceae   | Native              |
| <i>Cephalanthus occidentalis</i> L.                             | Buttonbush                | Rubiaceae     | Native              |
| <i>Cercis canadensis</i> L.                                     | Eastern Redbud            | Fabaceae      | Native              |
| <i>Chaerophyllum tainturieri</i> Hook.                          | Hairy-fruit Chervil       | Apiaceae      | Native              |
| <i>Chamaecrista fasciculata</i> (Michx.) Greene                 | Common Partridge-pea      | Fabaceae      | Native              |
| <i>Chasmanthium latifolium</i> (Michx.) Yates                   | River Oats                | Poaceae       | Native              |
| <i>Chasmanthium laxum</i> (L.) Yates                            | Slender Spikegrass        | Poaceae       | Native              |
| <i>Chimaphila maculata</i> (L.) Pursh                           | Spotted Wintergreen       | Ericaceae     | Native              |
| <i>Cinna arundinacea</i> L.                                     | Common Wood Reedgrass     | Poaceae       | Native              |
| <i>Circaea canadensis</i> (L.) Hill                             | Enchanter's Night-shade   | Onagraceae    | Native              |
| <i>Clematis virginiana</i> L.                                   | Virgin's-bower            | Ranunculaceae | Native              |
| <i>Clethra alnifolia</i> L.                                     | Sweet Pepperbush          | Clethraceae   | Native              |
| <i>Coleataenia anceps</i> (Michx.) Soreng                       | Beaked Panic Grass        | Poaceae       | Native              |
| <i>Coleataenia rigidula</i> (Bosc ex Nees) LeBlond              | Tall Flat Panic Grass     | Poaceae       | Native              |
| <i>Commelina communis</i> L.                                    | Asiatic Dayflower         | Commelinaceae | Invasive            |
| <i>Conoclinium coelestinum</i> (L.) DC.                         | Mistflower                | Asteraceae    | Native              |
| <i>Conyza canadensis</i> (L.) Cronq.                            | Common Horseweed          | Asteraceae    | Native              |
| <i>Coreopsis lanceolata</i> L.                                  | Long-stalk Coreopsis      | Asteraceae    | Native              |
| <i>Cornus amomum</i> P. Mill.                                   | Silky Dogwood             | Cornaceae     | Native              |
| <i>Cornus florida</i> L.                                        | Flowering Dogwood         | Cornaceae     | Native              |
| <i>Corylus americana</i> Walt.                                  | American Hazelnut         | Betulaceae    | Native              |
| <i>Crepis capillaris</i> (L.) Wallr.                            | Smooth Hawksbeard         | Asteraceae    | Non-native          |
| <i>Cryptotaenia canadensis</i> (L.) DC.                         | Honewort                  | Apiaceae      | Native              |
| <i>Cyperus strigosus</i> L.                                     | Straw-colored Flatsedge   | Cyperaceae    | Native              |
| <i>Dendrolycopodium obscurum</i> (L.) A. Haines                 | Common Tree-clubmoss      | Lycopodiaceae | Native              |
| <i>Desmodium glabellum</i> (Michx.) DC.                         | Dillenius' Tick-trefoil   | Fabaceae      | Native              |
| <i>Desmodium paniculatum</i> (L.) DC.                           | Narrow-leaf Tick-trefoil  | Fabaceae      | Native              |
| <i>Dichanthelium clandestinum</i> (L.) Gould                    | Deer-Tongue Grass         | Poaceae       | Native              |
| <i>Dichanthelium commutatum</i> (J.A. Schultes) Gould           | Variable Panic Grass      | Poaceae       | Native              |
| <i>Dichanthelium dichotomum</i> (L.) Gould                      | Small-fruited Panic Grass | Poaceae       | Native              |
| <i>Dichanthelium laxiflorum</i> (Lam.) Gould                    | Open-flower Panic Grass   | Poaceae       | Native              |
| <i>Dichanthelium microcarpon</i> (Muhl. ex Elliott) Mohlenbrock | Branched Panic Grass      | Poaceae       | Native              |

## Checklist of Species Sampled (Stream Dataset)

D. DeBerry (sites sampled during peak growing seasons, 2018 and 2019)

| Scientific Name                                         | Common Name                 | Family         | Status <sup>1</sup> |
|---------------------------------------------------------|-----------------------------|----------------|---------------------|
| <i>Dichanthelium scoparium</i> (Lam.) Gould             | Velvet Panic Grass          | Poaceae        | Native              |
| <i>Digitaria ciliaris</i> (Retz.) Koeler                | Southern Crabgrass          | Poaceae        | Native              |
| <i>Digitaria sanguinalis</i> (L.) Scop.                 | Northern Crabgrass          | Poaceae        | Non-native          |
| <i>Diodia virginiana</i> L.                             | Virginia Buttonweed         | Rubiaceae      | Native              |
| <i>Dioscorea villosa</i> L.                             | Wild Yam                    | Dioscoreaceae  | Native              |
| <i>Diospyros virginiana</i> L.                          | Common Persimmon            | Ebenaceae      | Native              |
| <i>Echinochloa crus-galli</i> (L.) Beauv.               | Barnyard Grass              | Poaceae        | Non-native          |
| <i>Echinochloa muricata</i> (Beauv.) Fern.              | Rough Barnyard Grass        | Poaceae        | Native              |
| <i>Eclipta prostrata</i> (L.) L.                        | False Daisy                 | Asteraceae     | Native              |
| <i>Elephantopus carolinianus</i> Raeusch.               | Carolina Elephant's-foot    | Asteraceae     | Native              |
| <i>Eleusine indica</i> (L.) Gaertn.                     | Indian Goosegrass           | Poaceae        | Non-native          |
| <i>Elymus hystrix</i> L.                                | Bottlebrush Grass           | Poaceae        | Native              |
| <i>Elymus virginicus</i> L.                             | Virginia Wild Rye           | Poaceae        | Native              |
| <i>Erechtites hieraciifolius</i> (L.) Raf. ex DC.       | Fireweed                    | Asteraceae     | Native              |
| <i>Euonymus alatus</i> (Thunb.) Sieb.                   | Winged Euonymus             | Celastraceae   | Invasive            |
| <i>Euonymus americanus</i> L.                           | Strawberry-bush             | Celastraceae   | Native              |
| <i>Euonymus fortunei</i> (Turcz.) Hand.-Maz.            | Winter Creeper              | Celastraceae   | Invasive            |
| <i>Eupatorium capillifolium</i> (Lam.) Small            | Dog-fennel                  | Asteraceae     | Native              |
| <i>Eupatorium perfoliatum</i> L.                        | Boneset                     | Asteraceae     | Native              |
| <i>Eupatorium rotundifolium</i> L.                      | Roundleaf Thoroughwort      | Asteraceae     | Native              |
| <i>Eupatorium serotinum</i> Michx.                      | Late Thoroughwort           | Asteraceae     | Native              |
| <i>Euthamia graminifolia</i> (L.) Nutt.                 | Grass-leaved Goldenrod      | Asteraceae     | Native              |
| <i>Eutrochium fistulosum</i> (Barratt) E.E. Lamont      | Hollow Joe-pye-weed         | Asteraceae     | Native              |
| <i>Eutrochium purpureum</i> (L.) E.E. Lamont            | Sweet-scented Joe-pye-weed  | Asteraceae     | Native              |
| <i>Fraxinus pennsylvanica</i> Marsh.                    | Green Ash                   | Oleaceae       | Native              |
| <i>Galium circaeazans</i> Michx.                        | Forest Bedstraw             | Rubiaceae      | Native              |
| <i>Galium tinctorium</i> (L.) Scop.                     | Three-lobed Bedstraw        | Rubiaceae      | Native              |
| <i>Galium triflorum</i> Michx.                          | Sweet-scented Bedstraw      | Rubiaceae      | Native              |
| <i>Geum canadense</i> Jacquin                           | White Avena                 | Rosaceae       | Native              |
| <i>Glechoma hederacea</i> L.                            | Ground-ivy                  | Lamiaceae      | Invasive            |
| <i>Helenium autumnale</i> L.                            | Common Sneezeweed           | Asteraceae     | Native              |
| <i>Hydrocotyle umbellata</i> L.                         | Marsh Water-pennywort       | Araliaceae     | Native              |
| <i>Hylodesmum nudiflorum</i> (L.) H. Ohashi & R.R. Mill | Naked-Flowered Tick-trefoil | Fabaceae       | Native              |
| <i>Hypericum hypericoides</i> (L.) Crantz               | St. Andrew's Cross          | Hypericaceae   | Native              |
| <i>Hypericum mutilum</i> L.                             | Dwarf St. John's-wort       | Hypericaceae   | Native              |
| <i>Hypericum punctatum</i> Lam.                         | Spotted St. John's-wort     | Hypericaceae   | Native              |
| <i>Ilex decidua</i> Walt.                               | Deciduous Holly             | Aquifoliaceae  | Native              |
| <i>Ilex glabra</i> (L.) Gray                            | Inkberry                    | Aquifoliaceae  | Native              |
| <i>Ilex opaca</i> Aiton                                 | American Holly              | Aquifoliaceae  | Native              |
| <i>Ilex verticillata</i> (L.) Gray                      | Winterberry                 | Aquifoliaceae  | Native              |
| <i>Impatiens capensis</i> Meerburg                      | Spotted Jewelweed           | Balsaminaceae  | Native              |
| <i>Ipomoea purpurea</i> (L.) Roth                       | Common Morning Glory        | Convolvulaceae | Non-native          |
| <i>Juglans nigra</i> L.                                 | Black Walnut                | Juglandaceae   | Native              |



## Checklist of Species Sampled (Stream Dataset)

D. DeBerry (sites sampled during peak growing seasons, 2018 and 2019)

| Scientific Name                                    | Common Name                 | Family           | Status <sup>1</sup> |
|----------------------------------------------------|-----------------------------|------------------|---------------------|
| <i>Juncus coriaceus</i> Mackenzie                  | Leathery Rush               | Juncaceae        | Native              |
| <i>Juncus dichotomus</i> Ell.                      | Forked Rush                 | Juncaceae        | Native              |
| <i>Juncus effusus</i> L.                           | Soft Rush                   | Juncaceae        | Native              |
| <i>Juncus scirpoides</i> Lam.                      | Needle-pod Rush             | Juncaceae        | Native              |
| <i>Juncus tenuis</i> Willd.                        | Path Rush                   | Juncaceae        | Native              |
| <i>Juniperus virginiana</i> L.                     | Eastern Redcedar            | Cupressaceae     | Native              |
| <i>Kummerowia striata</i> (Thunb.) Schindl.        | Japanese-clover             | Fabaceae         | Non-native          |
| <i>Laportea canadensis</i> (L.) Weddell            | Wood Nettle                 | Urticaceae       | Native              |
| <i>Leersia oryzoides</i> (L.) Sw.                  | Rice Cutgrass               | Poaceae          | Native              |
| <i>Leersia virginica</i> Willd.                    | White Grass                 | Poaceae          | Native              |
| <i>Lespedeza cuneata</i> (Dum.-Cours.) G. Don      | Sericea Lespedeza           | Fabaceae         | Invasive            |
| <i>Ligustrum sinense</i> Louriere                  | Chinese Privet              | Oleaceae         | Invasive            |
| <i>Lindera benzoin</i> (L.) Blume                  | Spicebush                   | Lauraceae        | Native              |
| <i>Liquidambar styraciflua</i> L.                  | Sweetgum                    | Altingiaceae     | Native              |
| <i>Liriodendron tulipifera</i> L.                  | Tulip-tree                  | Magnoliaceae     | Native              |
| <i>Lobelia siphilitica</i> L.                      | Great Blue Lobelia          | Campanulaceae    | Native              |
| <i>Lonicera japonica</i> Thunb.                    | Japanese Honeysuckle        | Caprifoliaceae   | Invasive            |
| <i>Lonicera morrowii</i> Gray                      | Morrow's Honeysuckle        | Caprifoliaceae   | Invasive            |
| <i>Ludwigia alternifolia</i> L.                    | Alternate-leaved Seedbox    | Onagraceae       | Native              |
| <i>Lycopus americanus</i> Muhl. ex W. Bart.        | American Bugleweed          | Lamiaceae        | Native              |
| <i>Lycopus virginicus</i> L.                       | Virginia Bugleweed          | Lamiaceae        | Native              |
| <i>Melia azedarach</i> L.                          | Chinaberry                  | Meliaceae        | Invasive            |
| <i>Melothria pendula</i> L.                        | Creeping Cucumber           | Cucurbitaceae    | Native              |
| <i>Microstegium vimineum</i> (Trin.) A. Camus      | Japanese Stiltgrass         | Poaceae          | Invasive            |
| <i>Mikania scandens</i> (L.) Willd.                | Climbing Hempweed           | Asteraceae       | Native              |
| <i>Mimulus alatus</i> Aiton                        | Winged Monkeyflower         | Phrymaceae       | Native              |
| <i>Mimulus ringens</i> L.                          | Square-stemmed Monkeyflower | Phrymaceae       | Native              |
| <i>Miscanthus sinensis</i> Anderss.                | Chinese Silvergrass         | Poaceae          | Invasive            |
| <i>Mitchella repens</i> L.                         | Partidge-berry              | Rubiaceae        | Native              |
| <i>Morella cerifera</i> (L.) Small                 | Wax Myrtle                  | Myricaceae       | Native              |
| <i>Morus rubra</i> L.                              | Red Mulberry                | Moraceae         | Native              |
| <i>Muhlenbergia schreberi</i> J.F. Gmel.           | Nimblewill                  | Poaceae          | Native              |
| <i>Murdannia keisak</i> (Hasskarl) Handel-Mazzetti | Marsh Dewflower             | Commelinaceae    | Invasive            |
| <i>Nyssa sylvatica</i> Marsh.                      | Black Gum                   | Nyssaceae        | Native              |
| <i>Onoclea sensibilis</i> L.                       | Sensitive Fern              | Onocleaceae      | Native              |
| <i>Osmorhiza longistylis</i> (Torr.) DC.           | Aniseroot                   | Apiaceae         | Native              |
| <i>Osmundastrum cinnamomeum</i> (L.) C. Presl      | Cinnamon Fern               | Osmundaceae      | Native              |
| <i>Oxalis dillenii</i> Jacquin                     | Southern Yellow Wood-sorrel | Oxalidaceae      | Native              |
| <i>Oxalis stricta</i> L.                           | Common Yellow Wood-sorrel   | Oxalidaceae      | Native              |
| <i>Packera aurea</i> (L.) A. & D. Love             | Golden Ragwort              | Asteraceae       | Native              |
| <i>Panicum dichotomiflorum</i> Michx.              | Fall Panic Grass            | Poaceae          | Native              |
| <i>Panicum virgatum</i> L.                         | Switchgrass                 | Poaceae          | Native              |
| <i>Parathelypteris noveboracensis</i> (L.) Ching   | New York Fern               | Thelypteridaceae | Native              |
| <i>Parthenocissus quinquefolia</i> (L.) Planch.    | Virginia-creeper            | Vitaceae         | Native              |

## Checklist of Species Sampled (Stream Dataset)

D. DeBerry (sites sampled during peak growing seasons, 2018 and 2019)

| Scientific Name                                                                            | Common Name               | Family           | Status <sup>1</sup> |
|--------------------------------------------------------------------------------------------|---------------------------|------------------|---------------------|
| <i>Paspalum floridanum</i> Michx.                                                          | Florida Paspalum          | Poaceae          | Native              |
| <i>Paspalum laeve</i> Michx.                                                               | Field Paspalum            | Poaceae          | Native              |
| <i>Passiflora incarnata</i> L.                                                             | Purple Passionflower      | Passifloraceae   | Native              |
| <i>Penstemon digitalis</i> Nutt. ex Sims                                                   | Foxglove Beard-tongue     | Plantaginaceae   | Native              |
| <i>Penthorum sedoides</i> L.                                                               | Ditch Stonecrop           | Penthoraceae     | Native              |
| <i>Perilla frutescens</i> (L.) Britt.                                                      | Beefsteak Plant           | Lamiaceae        | Invasive            |
| <i>Persicaria hydropiperoides</i> (Michx.) Small                                           | Mild Water-pepper         | Polygonaceae     | Native              |
| <i>Persicaria lapathifolia</i> (L.) Gray                                                   | Dock-leaf Smartweed       | Polygonaceae     | Native              |
| <i>Persicaria longiseta</i> (Bruijn) Kitagawa                                              | Bristly Lady's-Thumb      | Polygonaceae     | Invasive            |
| <i>Persicaria pensylvanica</i> (L.) M. Gomez                                               | Pennsylvania Smartweed    | Polygonaceae     | Native              |
| <i>Persicaria punctata</i> (Ell.) Small                                                    | Dotted Smartweed          | Polygonaceae     | Native              |
| <i>Persicaria sagittata</i> (L.) H. Gross ex Nakai                                         | Arrow-leaf Tearthumb      | Polygonaceae     | Native              |
| <i>Persicaria virginiana</i> (L.) Gaertn.                                                  | Jumpseed                  | Polygonaceae     | Native              |
| <i>Phegopteris hexagonoptera</i> (Michx.) Fee                                              | Broad Beech Fern          | Thelypteridaceae | Native              |
| <i>Phryma leptostachya</i> L.                                                              | Lopseed                   | Phrymaceae       | Native              |
| <i>Phyllanthus caroliniensis</i> Walt.                                                     | Carolina Leaf-flower      | Phyllanthaceae   | Native              |
| <i>Phytolacca americana</i> L.                                                             | Common Pokeweed           | Phytolaccaceae   | Native              |
| <i>Pilea pumila</i> (L.) Gray                                                              | Clearweed                 | Urticaceae       | Native              |
| <i>Pinus taeda</i> L.                                                                      | Loblolly Pine             | Pinaceae         | Native              |
| <i>Platanus occidentalis</i> L.                                                            | Sycamore                  | Platanaceae      | Native              |
| <i>Pluchea camphorata</i> (L.) DC.                                                         | Camphorweed               | Asteraceae       | Native              |
| <i>Polygonatum biflorum</i> (Walt.) Ell.                                                   | Solomon's-seal            | Ruscaceae        | Native              |
| <i>Polystichum acrostichoides</i> (Michx.) Schott                                          | Christmas Fern            | Dryopteridaceae  | Native              |
| <i>Populus deltoides</i> Bartram ex Marsh.                                                 | Eastern Cottonwood        | Salicaceae       | Native              |
| <i>Potentilla canadensis</i> L.                                                            | Canada Cinquefoil         | Rosaceae         | Native              |
| <i>Potentilla indica</i> (Andr.) T. Wolf                                                   | Indian-strawberry         | Rosaceae         | Non-native          |
| <i>Prunella vulgaris</i> L.                                                                | Heal-all                  | Lamiaceae        | Native              |
| <i>Prunus avium</i> (L.) L.                                                                | Sweet Cherry              | Rosaceae         | Non-native          |
| <i>Prunus serotina</i> Ehrhart                                                             | Black Cherry              | Rosaceae         | Native              |
| <i>Pseudognaphalium obtusifolium</i> (L.) Hilliard & Burt                                  | Sweet Everlasting         | Asteraceae       | Native              |
| <i>Pueraria montana</i> (Loureiro) Merritt var. <i>lobata</i> (Willd.) Maesen & S. Almeida | Kudzu                     | Fabaceae         | Invasive            |
| <i>Pycnanthemum incanum</i> (L.) Michx.                                                    | Hoary Mountain-mint       | Lamiaceae        | Native              |
| <i>Pycnanthemum tenuifolium</i> Schrad.                                                    | Narrow-leaf Mountain-mint | Lamiaceae        | Native              |
| <i>Pycnanthemum verticillatum</i> (Michx.) Pers.                                           | Whorled Mountain-mint     | Lamiaceae        | Native              |
| <i>Pyrus calleryana</i> Dcne.                                                              | Callery Pear              | Rosaceae         | Invasive            |
| <i>Quercus alba</i> L.                                                                     | White Oak                 | Fagaceae         | Native              |
| <i>Quercus bicolor</i> Willd.                                                              | Swamp White Oak           | Fagaceae         | Native              |
| <i>Quercus falcata</i> Michx.                                                              | Southern Red Oak          | Fagaceae         | Native              |
| <i>Quercus michauxii</i> Nutt.                                                             | Swamp Chestnut Oak        | Fagaceae         | Native              |
| <i>Quercus montana</i> L.                                                                  | Chestnut Oak              | Fagaceae         | Native              |
| <i>Quercus palustris</i> Muenchhausen                                                      | Pin Oak                   | Fagaceae         | Native              |
| <i>Quercus phellos</i> L.                                                                  | Willow Oak                | Fagaceae         | Native              |

## Checklist of Species Sampled (Stream Dataset)

D. DeBerry (sites sampled during peak growing seasons, 2018 and 2019)

| Scientific Name                                     | Common Name             | Family          | Status <sup>1</sup> |
|-----------------------------------------------------|-------------------------|-----------------|---------------------|
| <i>Quercus rubra</i> L.                             | Northern Red Oak        | Fagaceae        | Native              |
| <i>Ranunculus recurvatus</i> Poir.                  | Hooked Buttercup        | Ranunculaceae   | Native              |
| <i>Rhexia mariana</i> L.                            | Maryland Meadow Beauty  | Melastomataceae | Native              |
| <i>Rhexia virginica</i> L.                          | Virginia Meadow Beauty  | Melastomataceae | Native              |
| <i>Rhynchospora glomerata</i> (L.) Vahl             | Clustered Beaksedge     | Cyperaceae      | Native              |
| <i>Robinia pseudoacacia</i> L.                      | Black Locust            | Fabaceae        | Native              |
| <i>Rosa multiflora</i> Thunb. ex Murr.              | Multiflora Rose         | Rosaceae        | Invasive            |
| <i>Rosa virginiana</i> Miller                       | Virginia Rose           | Rosaceae        | Native              |
| <i>Rubus discolor</i> Weihe & Nees                  | Himalayan Blackberry    | Rosaceae        | Non-native          |
| <i>Rubus flagellaris</i> Willd.                     | Common Dewberry         | Rosaceae        | Native              |
| <i>Rubus hispidus</i> L.                            | Bristly Dewberry        | Rosaceae        | Native              |
| <i>Rubus occidentalis</i> L.                        | Black Raspberry         | Rosaceae        | Native              |
| <i>Rubus pensilvanicus</i> Poir.                    | Pennsylvania Blackberry | Rosaceae        | Native              |
| <i>Rudbeckia hirta</i> L.                           | Black-eyed Susan        | Asteraceae      | Native              |
| <i>Rumex obtusifolius</i> L.                        | Bitter Dock             | Polygonaceae    | Non-native          |
| <i>Salix nigra</i> Marsh.                           | Black Willow            | Salicaceae      | Native              |
| <i>Sambucus canadensis</i> L.                       | Common Elderberry       | Adoxaceae       | Native              |
| <i>Sanicula canadensis</i> L.                       | Black Snakeroot         | Apiaceae        | Native              |
| <i>Saururus cernuus</i> L.                          | Lizard's-tail           | Saururaceae     | Native              |
| <i>Sceptridium dissectum</i> (Sprengel) Lyon        | Cut-leaf Grape Fern     | Ophioglossaceae | Native              |
| <i>Schizachyrium scoparium</i> (Michx.) Nash        | Little Bluestem         | Poaceae         | Native              |
| <i>Scirpus cyperinus</i> (L.) Kunth                 | Woolgrass               | Cyperaceae      | Native              |
| <i>Scirpus georgianus</i> Harper                    | Georgia Bulrush         | Cyperaceae      | Native              |
| <i>Scirpus polyphyllus</i> Vahl                     | Leafy Bulrush           | Cyperaceae      | Native              |
| <i>Scutellaria integrifolia</i> L.                  | Hyssop Skullcap         | Lamiaceae       | Native              |
| <i>Senna marilandica</i> (L.) Link                  | Maryland Wild Senna     | Fabaceae        | Native              |
| <i>Setaria parviflora</i> (Poir.) Kerguelen         | Knotroot Foxtail        | Poaceae         | Native              |
| <i>Sicyos angulatus</i> L.                          | Bur Cucumber            | Cucurbitaceae   | Native              |
| <i>Sida spinosa</i> L.                              | Prickly Mallow          | Malvaceae       | Non-native          |
| <i>Silene stellata</i> (L.) Ait. f.                 | Starry Campion          | Caryophyllaceae | Native              |
| <i>Smilax glauca</i> Walt.                          | Catbrier                | Smilacaceae     | Native              |
| <i>Smilax rotundifolia</i> L.                       | Common Greenbrier       | Smilacaceae     | Native              |
| <i>Solanum carolinense</i> L.                       | Horse-nettle            | Solanaceae      | Native              |
| <i>Solidago altissima</i> L.                        | Tall Goldenrod          | Asteraceae      | Native              |
| <i>Solidago patula</i> Muhl. ex Willd.              | Rough-leaved Goldenrod  | Asteraceae      | Native              |
| <i>Solidago rugosa</i> P. Mill.                     | Wrinkle-leaf Goldenrod  | Asteraceae      | Native              |
| <i>Sorghastrum nutans</i> (L.) Nash                 | Indian Grass            | Poaceae         | Native              |
| <i>Sorghum halepense</i> (L.) Pers.                 | Johnson Grass           | Poaceae         | Invasive            |
| <i>Stellaria media</i> (L.) Vill.                   | Common Chickweed        | Caryophyllaceae | Invasive            |
| <i>Symphoricarpos orbiculatus</i> Moench            | Coralberry              | Caprifoliaceae  | Native              |
| <i>Symphyotrichum lanceolatum</i> (Willd.) Nesom    | Panicled Aster          | Asteraceae      | Native              |
| <i>Symphyotrichum lateriflorum</i> (L.) A.& D. Love | Calico Aster            | Asteraceae      | Native              |
| <i>Symphyotrichum novae-angliae</i> (L.) Nesom      | New England Aster       | Asteraceae      | Native              |
| <i>Symphyotrichum novi-belgii</i> (L.) Nesom        | New York Aster          | Asteraceae      | Native              |

## Checklist of Species Sampled (Stream Dataset)

D. DeBerry (sites sampled during peak growing seasons, 2018 and 2019)

| Scientific Name                                                          | Common Name             | Family           | Status <sup>1</sup> |
|--------------------------------------------------------------------------|-------------------------|------------------|---------------------|
| <i>Symphyotrichum pilosum</i> (Willd.) Nesom                             | Frost Aster             | Asteraceae       | Native              |
| <i>Symphyotrichum puniceum</i> (L.) A.& D. Love                          | Purple-stem Aster       | Asteraceae       | Native              |
| <i>Symphyotrichum racemosum</i> (Ell.) Nesom                             | Small White Aster       | Asteraceae       | Native              |
| <i>Symphyotrichum undulatum</i> (L.) Nesom                               | Wavy-leaved Aster       | Asteraceae       | Native              |
| <i>Teucrium canadense</i> L.                                             | Canada Germander        | Lamiaceae        | Native              |
| <i>Thelypteris palustris</i> Schott var. <i>pubescens</i> (Lawson) Fern. | Marsh Fern              | Thelypteridaceae | Native              |
| <i>Toxicodendron radicans</i> (L.) Kuntze                                | Poison Ivy              | Anacardiaceae    | Native              |
| <i>Tridens flavus</i> (L.) A.S. Hitchc.                                  | Purpletop               | Poaceae          | Native              |
| <i>Trifolium repens</i> L.                                               | White Clover            | Fabaceae         | Non-native          |
| <i>Tripsacum dactyloides</i> (L.) L.                                     | Eastern Gamagrass       | Poaceae          | Native              |
| <i>Ulmus alata</i> Michx.                                                | Winged Elm              | Ulmaceae         | Native              |
| <i>Ulmus americana</i> L.                                                | American Elm            | Ulmaceae         | Native              |
| <i>Ulmus rubra</i> Muhl.                                                 | Slippery Elm            | Ulmaceae         | Native              |
| <i>Uvularia perfoliata</i> L.                                            | Perfoliate Bellwort     | Colchicaceae     | Native              |
| <i>Vaccinium pallidum</i> Ait.                                           | Early Lowbush Blueberry | Ericaceae        | Native              |
| <i>Verbena hastata</i> L.                                                | Blue Vervain            | Verbenaceae      | Native              |
| <i>Verbena urticifolia</i> L.                                            | White Vervain           | Verbenaceae      | Native              |
| <i>Verbesina alternifolia</i> (L.) Britt. ex Kearney                     | Wingstem                | Asteraceae       | Native              |
| <i>Verbesina occidentalis</i> (L.) Walt.                                 | Yellow Crownbeard       | Asteraceae       | Native              |
| <i>Vernonia noveboracensis</i> (L.) Michx.                               | New York Ironweed       | Asteraceae       | Native              |
| <i>Viburnum dentatum</i> L.                                              | Arrow-wood              | Adoxaceae        | Native              |
| <i>Viburnum plicatum</i> Thunb.                                          | Japanese Snowball       | Adoxaceae        | Non-native          |
| <i>Viburnum prunifolium</i> L.                                           | Black Haw               | Adoxaceae        | Native              |
| <i>Viola sororia</i> Willd.                                              | Common Blue Violet      | Violaceae        | Native              |
| <i>Vitis labrusca</i> L.                                                 | Fox Grape               | Vitaceae         | Native              |
| <i>Vitis rotundifolia</i> Michx.                                         | Muscadine Grape         | Vitaceae         | Native              |
| <i>Woodwardia areolata</i> (L.) T. Moore                                 | Netted Chain Fern       | Blechnaceae      | Native              |
| <i>Xanthium strumarium</i> L.                                            | Common Cocklebur        | Asteraceae       | Native              |

<sup>1</sup> Status = "Native", "Non-native", or "Invasive" in accordance with Heffernan et al. (2014) and Weakley et al. (2020).
